# Supplementary material
Source: PubMed Central journal article supplement (PMC3437550)
Supplement: NIHMS335574-supplement-1.pdf [file NIHMS335574-supplement-1.pdf]

**Effects of Lipid-Analog Detergent Solubilization on the Functionality and Lipidic Cubic Phase Mobility of the *Torpedo californica* Nicotinic Acetylcholine Receptor**

**<sup>1</sup>Luis F. Padilla-Morales, <sup>2</sup>Claudio L. Morales-Pérez, <sup>1</sup>Pamela C. De La Cruz-Rivera, <sup>3</sup>Guillermo Asmar-Rovira, <sup>2</sup>Carlos A. Báez-Pagán, <sup>4\*</sup>Orestes Quesada, and <sup>1,2\*</sup>José A. Lasalde-Dominicci.**

- (1) Department of Chemistry, University of Puerto Rico, Río Piedras Campus, San Juan, PR
- (2) Department of Biology, University of Puerto Rico, Río Piedras Campus, San Juan, PR
- (3) Department of Molecular Biology, The Scripps Research Institute, La Jolla, CA
- (4) Department of Physical Sciences, University of Puerto Rico, Río Piedras Campus, San Juan, PR

\*Corresponding authors;

José A. Lasalde-Dominicci and Orestes Quesada

University of Puerto Rico, Río Piedras Campus, Department of Biology, PO Box 23346, San Juan, PR 00931-3346.

Tel. 787-764-0000 ext. 4887, 4752

Fax. 787-753-3852

[jasalde@gmail.com](mailto:jasalde@gmail.com)

[quesada.orestes@gmail.com](mailto:quesada.orestes@gmail.com)

Supplementary:

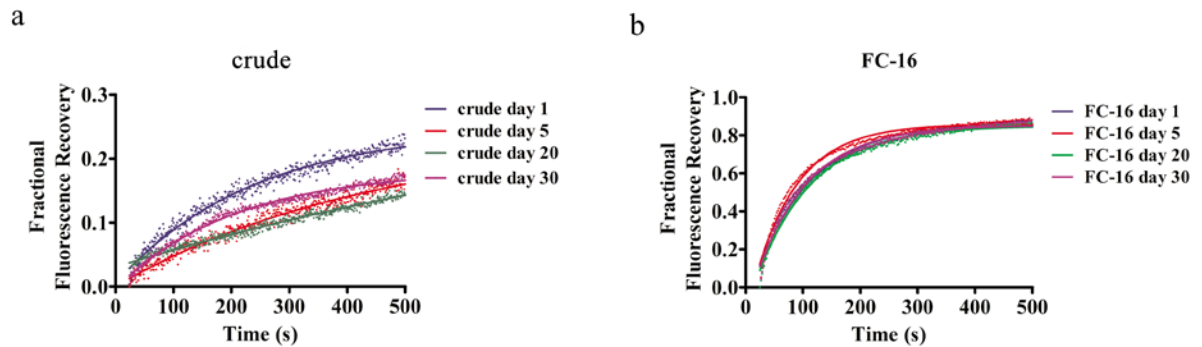

**Fig S1:** FRAP curves monitoring fractional recovery for a period of 30 days for crude membrane protein (a) and affinity-purified nAChR using FC-16 (b). Measurements were made at 1, 5, 20, and 30 days.

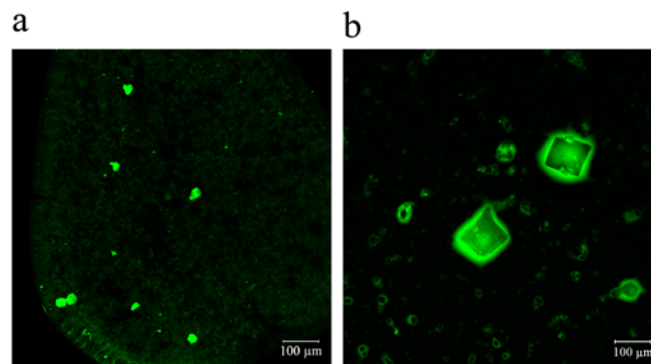

**Fig S2:** Potential nAChR crystals formed in the LCP from LFC-16 and CHAPSO solubilized *Torpedo californica* nAChR. (a) Amorphous crystals displaying intense fluorescence corresponding to labeled  $\alpha$ -BTX bound to the nAChR.. (b) Potential nAChR crystals formed in the LCP from LFC-16.
